# Supplementary material for: Reviews and syntheses: 210 Pb-derived sediment and carbon accumulation rates in vegetated coastal ecosystems – setting the record straight
Source: Copernicus journal article supplement (doi:10.5194/bg-15-6791-2018), 2018-11-15
Supplement: Supplementary file 1 [file bg-15-6791-2018-supplement.zip]

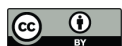

## *Supplement of*

# **Reviews and syntheses: $^{210}\text{Pb}$ -derived sediment and carbon accumulation rates in vegetated coastal ecosystems – setting the record straight**

**Ariane Arias-Ortiz et al.**

*Correspondence to:* Ariane Arias-Ortiz (ariane.arias@uab.cat)

- bg-15-6791-2018-supplement-title-page.pdf
- Supplementary material bg\_2018\_78.xlsx

The copyright of individual parts of the supplement might differ from the CC BY 4.0 License.
